# Supplementary material for: Integrating metabolomics and targeted gene expression to uncover potential biomarkers of fungal/oomycetes-associated disease susceptibility in grapevine
Source: PubMed Central journal article supplement (PMC7515887; doi:10.1038/s41598-020-72781-2), 2020-09-24

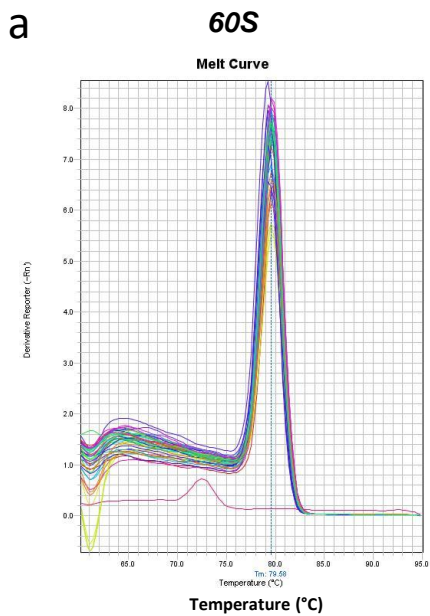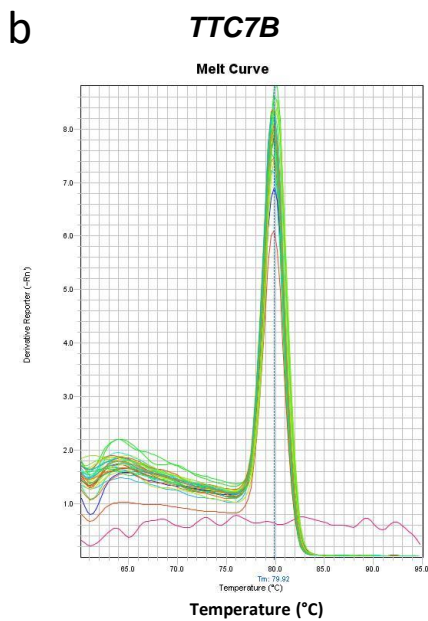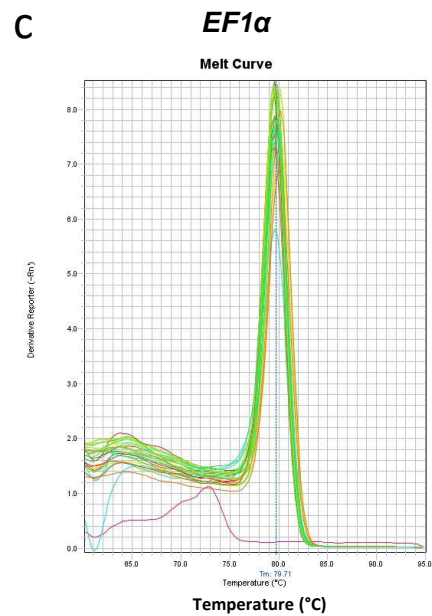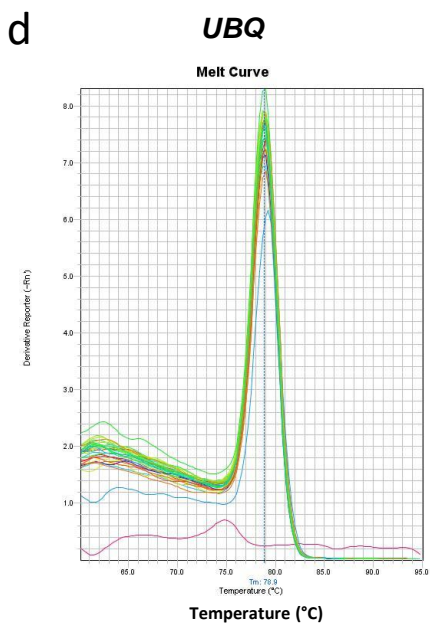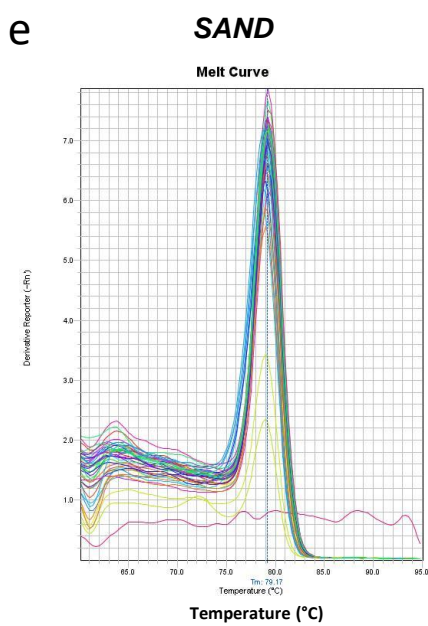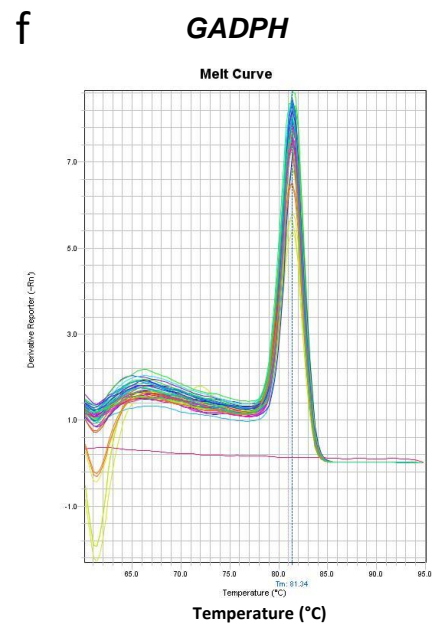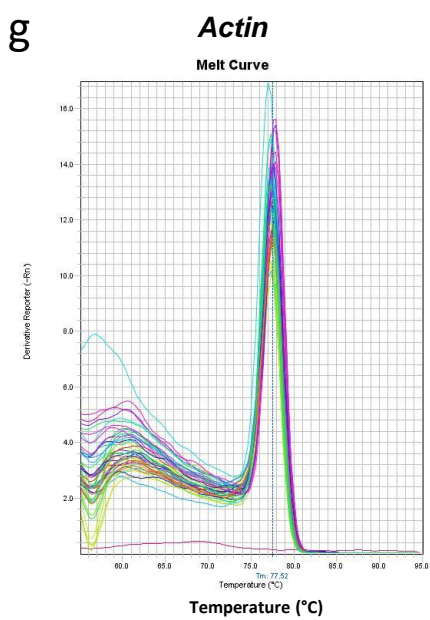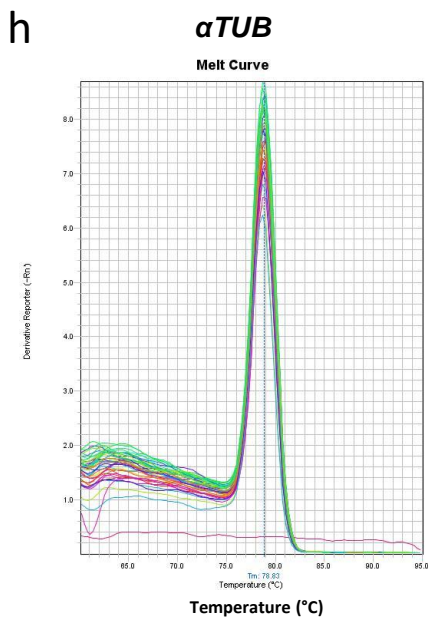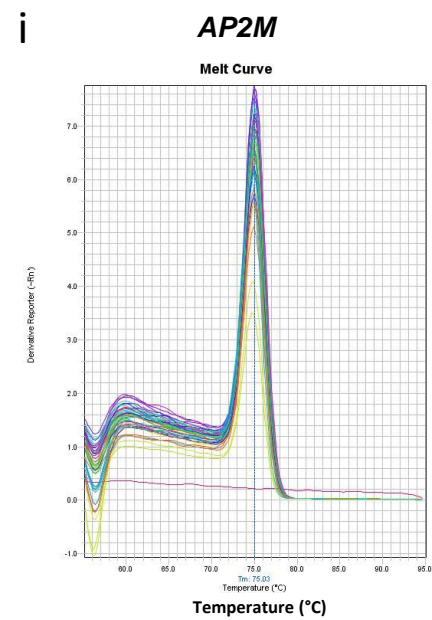

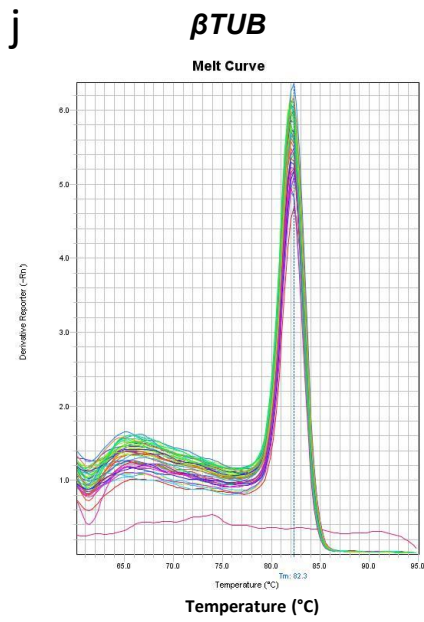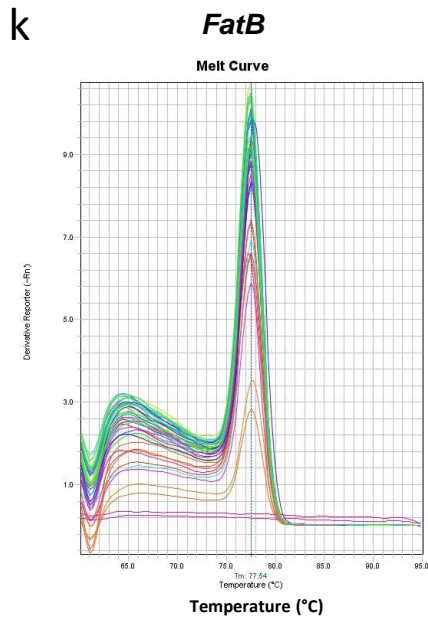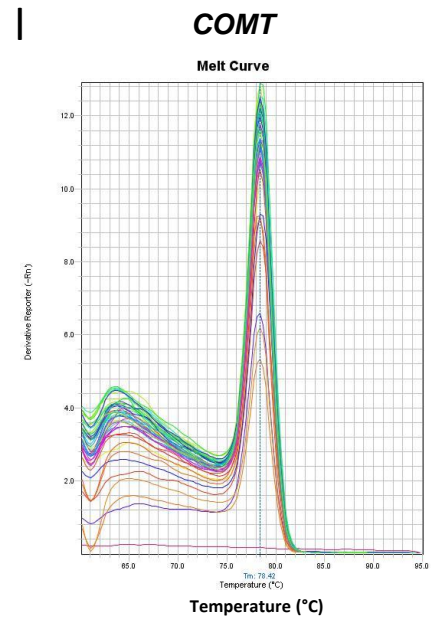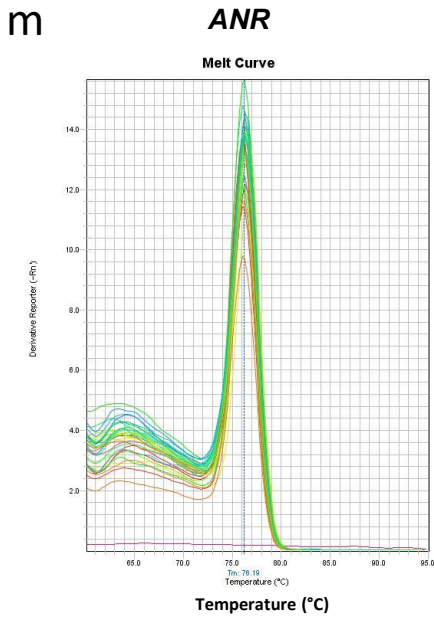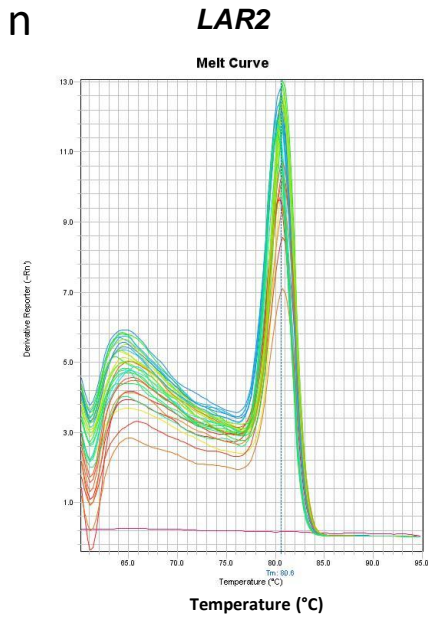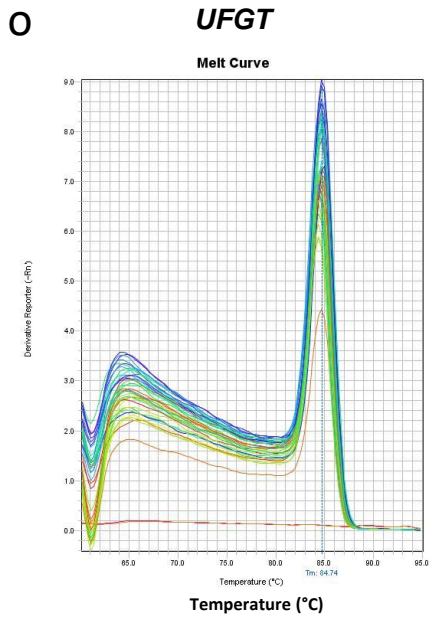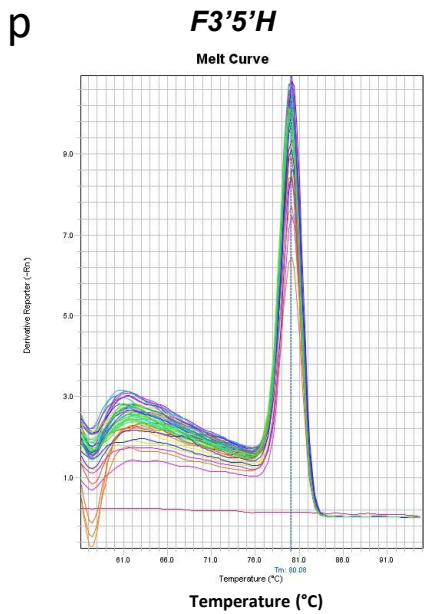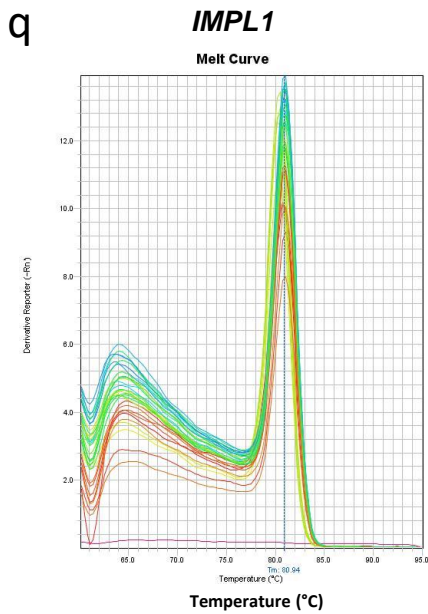

Supplement: 41598_2020_72781_MOESM3_ESM.pdf [file 41598_2020_72781_MOESM3_ESM.pdf]
